# Supplementary material for: Designing locally ordered structures of MnO2 for high-rate cathodes in aqueous zinc-ion batteries
Source: Royal Society of Chemistry journal article supplement (doi:10.1039/d4ta07536f), 2024-12-24
Supplement: d4ta07536f1.pdf [file d4ta07536f1.pdf]

## Supporting Information

### Designing Locally Ordered Structures of MnO<sub>2</sub> for High-Rate Cathode in Aqueous Zinc-Ion Batteries

Shuhao Zhou<sup>a, b</sup>, Shengyu Liang<sup>b</sup>, Shanshan Liu<sup>b</sup>, Shouyue Wang<sup>b</sup>, Wei Zhang<sup>b</sup>, Meng Li<sup>c</sup>, Jingxia Qiu<sup>\*a</sup>, Sheng Li<sup>\*b</sup>

<sup>a</sup> School of Physical and Mathematical Sciences, Nanjing Tech University (NanjingTech), Nanjing 211816, China

<sup>b</sup> Key Laboratory of Flexible Electronics (KLOFE) and Institute of Advanced Materials (IAM), School of Flexible Electronics (Future Technologies), Nanjing Tech University (NanjingTech), Nanjing 211816, China

<sup>c</sup> Institute for Sustainable Transformation, School of Chemical Engineering and Light Industry, Guangdong University of Technology, Guangzhou Mega University Town, Guangzhou 510006, China

## EXPERIMENTAL SECTION

### Materials Preparation

Firstly, 3.16 g  $\text{KMnO}_4$  and 4.56 g  $\text{H}_2\text{C}_2\text{O}_4$  are dissolved in 500 mL deionized water (DI water) and vigorously stirred. Then, the  $\text{KMnO}_4$  solution was added to the  $\text{H}_2\text{C}_2\text{O}_4$  solution dropwise and reacted for 8 hours under vigorous stirring in an ambient atmosphere. After that, the precipitate was collected by centrifugation and washing with DI water three times, followed by a freeze-drying process. At last, the final product (LOM) was obtained by annealing the precipitate in an air atmosphere for 9 hours at 300 °C with a heating rate of 5 °C/min.

The synthesis method of  $\alpha\text{-MnO}_2$  is derived from the previous report<sup>1</sup>. Firstly, 0.507 g  $\text{MnSO}_4\cdot\text{H}_2\text{O}$  and 2 mL 0.5 mol  $\text{L}^{-1}$   $\text{H}_2\text{SO}_4$  were dissolved in 60 mL DI water and vigorously stirred for 10 min. Then, 0.316 g  $\text{KMnO}_4$  was dissolved in 20 mL DI water and added to the  $\text{MnSO}_4\cdot\text{H}_2\text{O}$  solution dropwise, followed by vigorously stirring for one hour in an ambient atmosphere. After that, the mixture was ultrasonicated for 30 min before being sealed into a 100 mL Teflon-lined autoclave for 12 h at 120 °C. Finally, the product ( $\alpha\text{-MnO}_2$ ) was collected by centrifugation and washing with DI water three times, followed by air drying.

### Preparation of the LOM Electrode.

Mixing LOM, Super-P, MWCNT, and PVDF in the NMP solvent with a weight ratio of 7:1:1:1 to form a slurry. MWCNT was added to construct a conductive network without changing the whole weight ratio of the conducting component. Then, the slurry was spread on the Ti foil current collector and kept heating at 60 °C in the air drying oven overnight. At last, the electrode was made by cutting the Ti foil loading with slurry into discs with a diameter of 14 mm. The average mass loading of the electrode ranges from 0.8-1.2 mg.

### **Preparation of the $\alpha$ -MnO<sub>2</sub> Electrode and Battery Assembling.**

The process is the same as the LOM electrode, except that the slurry was formed with  $\alpha$ -MnO<sub>2</sub>, Super-P, MWCNT, and PVDF in the NMP solvent with a weight ratio of 7:1:1:1. Pure zinc foil was cut into discs with a diameter of 14 mm and used as the anode. Glass fiber (GF/F) was used as a separator. An aqueous electrolyte consisted of 2 M ZnSO<sub>4</sub> + 0.25 M MnSO<sub>4</sub>. MnSO<sub>4</sub> was added to the electrolyte to restrain the dissolution of Mn<sup>2+</sup>. The coin-type (CR2025) battery was assembled using materials prepared above in an ambient atmosphere.

### **Material Characterization and Electrochemical Measurements.**

**Material Characterization.** The morphology and microstructure of electrode materials are investigated by scanning electron microscopy (JEOL, JSM-7800F) and transmission electron microscopy ((JEOL, JEM-2100F). Element distribution of LOM is detected by EDS Mapping. The detailed nanostructure of LOM is characterized by high-resolution transmission electron microscopy (HRTEM). Selected area electron diffraction (SAED) and X-ray diffraction (XRD, Rigaku, Smartlab, Cu K $\alpha$  radiation,  $\lambda$  = 1.5418 Å) were introduced to confirm the structure properties of electrode materials. The chemical valence state is analyzed using X-ray photoelectron spectroscopy (XPS, Thermo Fisher, ESCALAB250Xi). The existence of oxygen vacancies and variation of the structure is confirmed by electron paramagnetic resonance (EPR, Bruker, EMXplus-6/1) spectroscopy and laser confocal Raman microscope (Raman, Witec, Alpha300).

**Electrochemical Measurements.** The galvanostatic charge-discharge tests of the CR2025 coin-type battery were performed on a battery test system (LAND, CT-2001A) with an operating voltage of 1-1.85 V. Cyclic voltammetry (CV) test was conducted on an electrochemical workstation (Bio-logic, VMP-300). Electrochemical impedance

spectroscopy (EIS) tests were measured using CORRTEST CS3104.

### **Computational Details.**

All the calculations are performed in the framework of the density functional theory with the projector augmented plane-wave method, as implemented in the Vienna ab initio simulation package<sup>2</sup>. The generalized gradient approximation proposed by Perdew, Burke, and Ernzerhof is selected for the exchange-correlation potential<sup>3</sup>. The long-range van der Waals interaction is described by the DFT-D3 approach<sup>4</sup>. The cut-off energy for the plane wave is set to 520 eV. DFT+U corrections are introduced with  $U=3.9$  eV (according to the Materials project) to describe the strong on-site Coulomb interaction of localized *d*-electrons of Mn. The energy criterion is set to  $10^{-6}$  eV in the iterative solution of the Kohn-Sham equation. The Brillouin zone integration is performed using a  $2 \times 2 \times 1$  k-mesh. The mixture of the LOM model was obtained by an AIMD heating at 4000 K with half of the atoms fixed. Before DOS calculations, all the structures are relaxed until the residual forces on the atoms have declined to less than  $0.03$  eV/Å.

1. B. Wu, G. Zhang, M. Yan, T. Xiong, P. He, L. He, X. Xu and L. Mai, *Small*, 2018, **14**, 1703850.
2. G. Kresse and D. Joubert, *Phys. Rev. B.*, 1999, **59**, 1758-1775.
3. J. P. Perdew, K. Burke and M. Ernzerhof, *Phys. Rev. Lett.*, 1996, **77**, 3865-3868.
4. S. Grimme, J. Antony, S. Ehrlich and H. Krieg, *J. Chem. Phys.*, 2010, **132**.

## Supplementary Figures

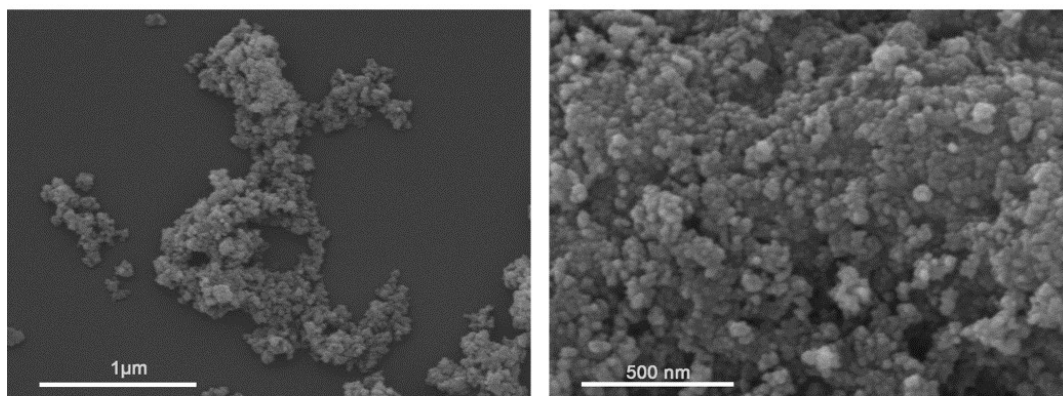

**Figure S1.** SEM images of LOM.

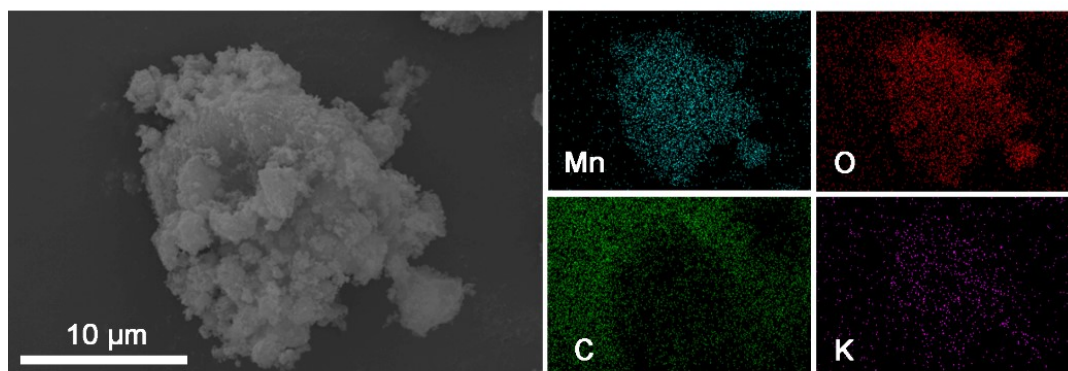

**Figure S2.** EDS mapping of Mn, O, C, and K elements.

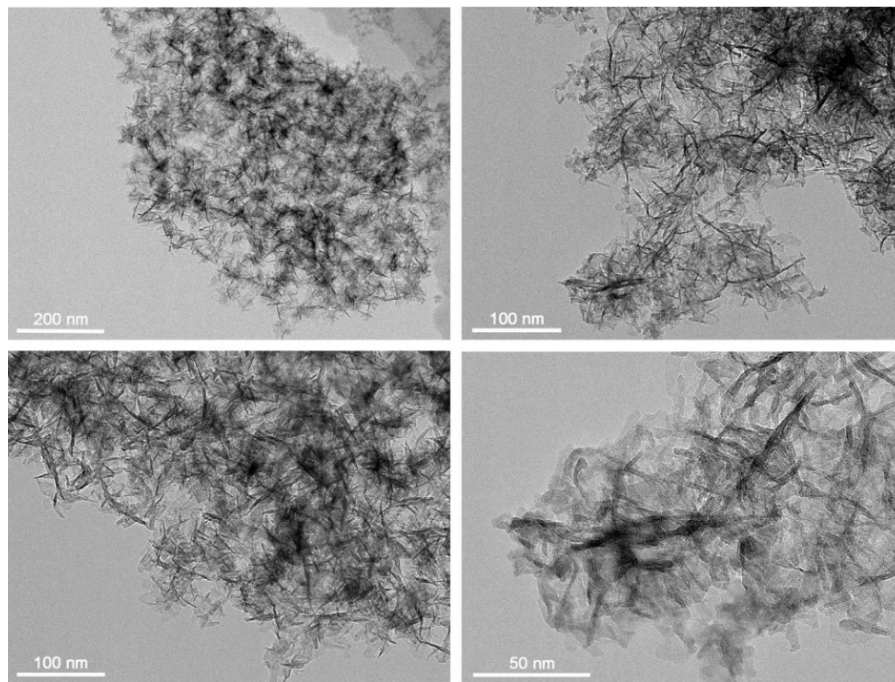

**Figure S3.** TEM images of LOM.

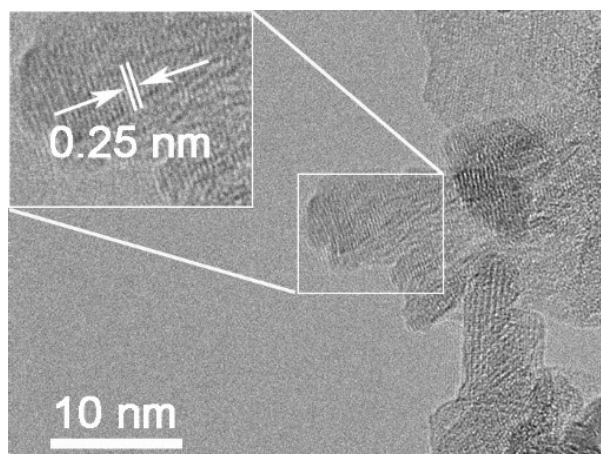

**Figure S4.** HRTEM image of LOM.

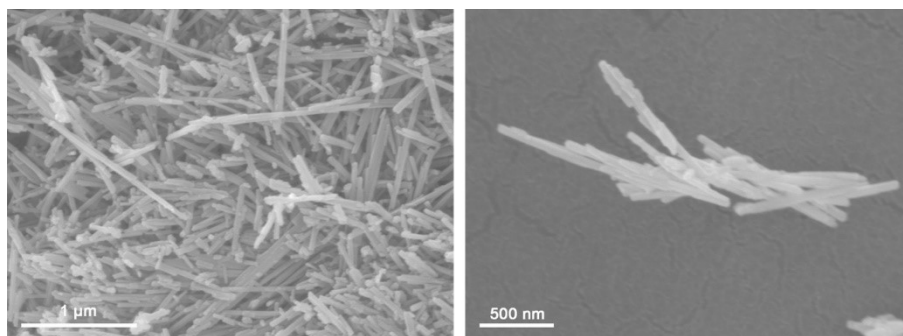

**Figure S5.** SEM images of  $\alpha$ - $\text{MnO}_2$ .

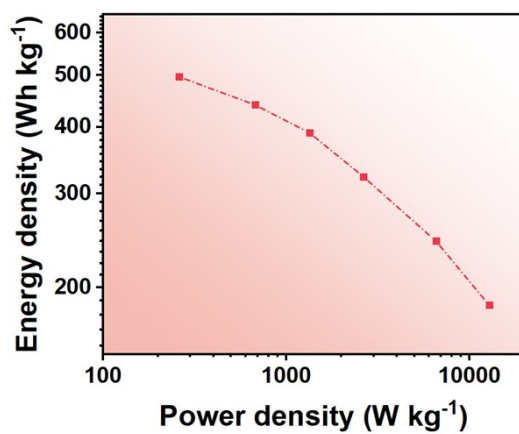

**Figure S6** The Ragone plot of the LOM electrode.

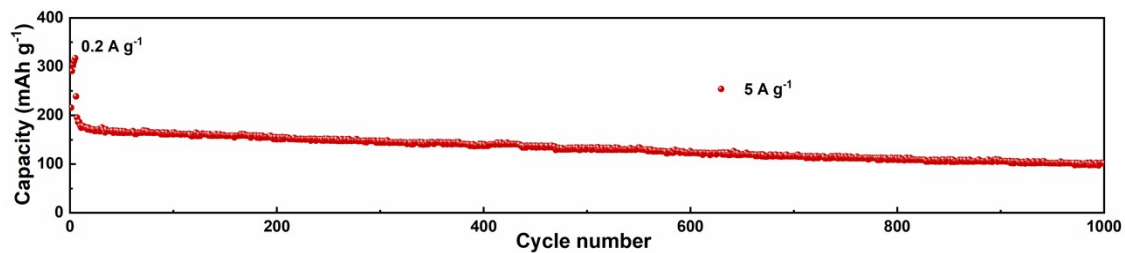

**Figure S7.** Long cycling performance of the LOM electrode at 5 A g<sup>-1</sup>.

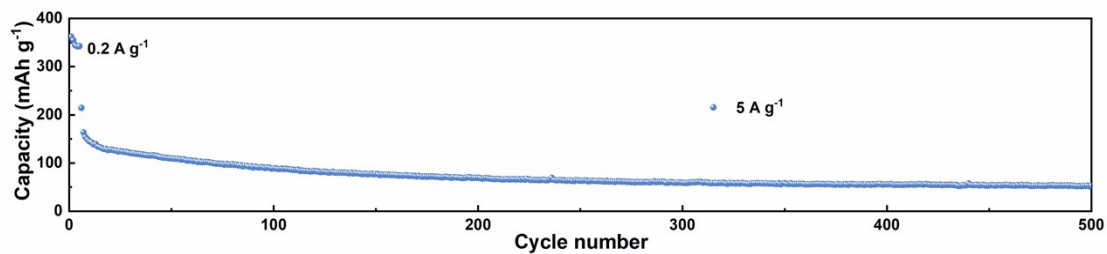

**Figure S8.** Long cycling performance of the  $\alpha$ -MnO<sub>2</sub> electrode at 5 A g<sup>-1</sup>.
